# Supplementary material
Source: PubMed Central journal article supplement (PMC2878027)
Supplement: supp_M110.113720_jbc.M110.113720-1.pdf [file supp_M110.113720_jbc.M110.113720-1.pdf]

## SUPPLEMENTAL DATA FOR

### A NEW GROUP OF AROMATIC PRENYLTRANSFERASES IN FUNGI, CATALYSING A 2,7-DIHYDROXYNAPHTHALENE DIMETHYLALLYL- TRANSFERASE REACTION

**Elisa Haug-Schifferdecker, Deniz Arican, Reinhard Brückner, Lutz Heide**

Tables S1 to S5 show the genes surrounding the *ptf* genes in the genomes of the respective fungal genomes. Database searches for the closest orthologs were performed with the BLASTP programme (<http://www.ncbi.nlm.nih.gov/>).

Figures S1 and S2 show the  $^1\text{H-NMR}$  and  $^{13}\text{C-NMR}$  spectra of the enzymatic product formed by Ptf<sub>At</sub> from 2,7-dihydroxynaphthalene and DMAPP.

Table S1: Genes surrounding the *ptf<sub>At</sub>* gene in the genome of *Aspergillus terreus* NIH2624 (accession no. CH476594)

| Gene                                           | Size<br>(aa) | Ortholog identified by BLAST search                | Identity/<br>Similarity<br>(%) | Origin                                              | Protein<br>accession<br>No |
|------------------------------------------------|--------------|----------------------------------------------------|--------------------------------|-----------------------------------------------------|----------------------------|
| ATEG_00811                                     | 401          | hypothetical protein                               | 66/81                          | <i>Aspergillus niger</i>                            | CAK96480                   |
| ATEG_00812                                     | 648          | acetyl-coenzyme A synthetase                       | 64/79                          | <i>Aspergillus fumigatus</i> Af293                  | EAL89682                   |
| ATEG_00813                                     | 1329         | hypothetical protein                               | 72/81                          | <i>Aspergillus oryzae</i>                           | BAE56163                   |
| ATEG_00814                                     | 522          | putative choline transport protein                 | 86/94                          | <i>Aspergillus flavus</i> NRRL3357                  | EED57752                   |
| ATEG_00815                                     | 377          | conserved hypothetical protein                     | 77/86                          | <i>Neosartorya fischeri</i> NRRL181                 | EAW22332                   |
| ATEG_00816                                     | 591          | polysaccharide deacetylase family protein          | 79/87                          | <i>Neosartorya fischeri</i> NRRL181                 | EAW22333                   |
| ATEG_00817                                     | 528          | hypothetical protein                               | 72/83                          | <i>Aspergillus niger</i>                            | CAK44057                   |
| ATEG_00818                                     | 445          | UDP-N-acetylglucosamine enolpyruvyl<br>transferase | 59/74                          | <i>Neosartorya fischeri</i> NRRL181                 | EAW18555                   |
| ATEG_00819                                     | 839          | putative UDP-N-acetylmuramate--L-alanine<br>ligase | 94/97                          | <i>Aspergillus flavus</i> NRRL3357                  | EED46932                   |
| ATEG_00820                                     | 584          | hypothetical protein                               | 74/84                          | <i>Aspergillus nidulans</i> FGSC A4                 | EAA66650                   |
| <b>ATEG_00821</b><br>= <i>ptf<sub>At</sub></i> | <b>336</b>   | hypothetical protein SS1G_09465                    | 48/64                          | <i>Sclerotinia sclerotiorum</i> 1980                | EDN93598                   |
| ATEG_00822                                     | 188          | Pc22g22620                                         | 31/54                          | <i>Penicillium chrysogenum</i><br>Wisconsin 54-1255 | CAP99550                   |
| ATEG_00823                                     | 540          | 3-phytase A precursor                              | 50/66                          | <i>Pyrenophora tritici-repentis</i><br>Pt-1C-BFP    | EDU47362                   |
| ATEG_00824                                     | 1012         | hypothetical protein                               | 45/60                          | <i>Aspergillus niger</i>                            | CAK43185                   |
| ATEG_00825                                     | 929          | hypothetical protein                               | 91/96                          | <i>Aspergillus niger</i>                            | CAK96205                   |
| ATEG_00826                                     | 362          | conserved hypothetical protein                     | 73/84                          | <i>Aspergillus flavus</i> NRRL3357                  | EED57747                   |
| ATEG_00827                                     | 265          | putative autophagy protein Atg27                   | 61/78                          | <i>Aspergillus flavus</i> NRRL3357                  | EED57746                   |
| ATEG_00828                                     | 158          | putative prefoldin subunit 4                       | 70/78                          | <i>Aspergillus flavus</i> NRRL3357                  | EED57744                   |
| ATEG_00829                                     | 809          | hypothetical protein                               | 73/81                          | <i>Aspergillus oryzae</i>                           | BAE56155                   |
| ATEG_00830                                     | 110          | hypothetical protein                               | 27/43                          | <i>Aspergillus oryzae</i> RIB40                     | BAE64290                   |
| ATEG_00831                                     | 143          | conserved hypothetical protein                     | 78/86                          | <i>Aspergillus flavus</i> NRRL3357                  | EED57742                   |

Table S2: Genes surrounding the *ptf<sub>BF</sub>* gene in the genome of *Botryotinia fuckeliana* B05.10 (accession no. CH476844)

| Gene                                                  | Size<br>(aa) | Ortholog identified by BLAST search                                                     | Identity/<br>Similarity<br>(%) | Origin                                  | Protein<br>accession<br>No |
|-------------------------------------------------------|--------------|-----------------------------------------------------------------------------------------|--------------------------------|-----------------------------------------|----------------------------|
| BC1G_01285                                            | 497          | Ca <sup>2+</sup> /H <sup>+</sup> antiporter                                             | 89/94                          | Sclerotinia sclerotiorum 1980           | EDN93607                   |
| BC1G_01286                                            | 245          | hypothetical protein SS1G_09475<br>(carboxypeptidase 4)                                 | 89/94                          | Sclerotinia sclerotiorum 1980           | EDN93608                   |
| BC1G_01287                                            | 122          | hypothetical protein SS1G_09475<br>(carboxypeptidase 4)                                 | 88/93                          | Sclerotinia sclerotiorum 1980           | EDN93608                   |
| BC1G_01288                                            | 553          | hypothetical protein SS1G_09476<br>(hypothetical protein)                               | 76/82                          | Sclerotinia sclerotiorum 1980           | EDN93609                   |
| BC1G_01289                                            | 678          | hypothetical protein SS1G_09477<br>(peptidoglycan binding domain containing<br>protein) | 64/77                          | Sclerotinia sclerotiorum 1980           | EDN93610                   |
| BC1G_01290                                            | 168          | hypothetical protein SS1G_09470<br>(RPEL repeat protein)                                | 92/95                          | Sclerotinia sclerotiorum 1980           | EDN93603                   |
| BC1G_01291                                            | 624          | hypothetical protein SS1G_09467<br>(DNA-Polymerase K)                                   | 86/91                          | Sclerotinia sclerotiorum 1980           | EDN93600                   |
| BC1G_01292                                            | 804          | hypothetical protein SS1G_09468<br>(elongation factor G)                                | 97/98                          | Sclerotinia sclerotiorum 1980           | EDN93601                   |
| BC1G_01293                                            | 306          | hypothetical protein                                                                    | 52/69                          | Aspergillus oryzae RIB40                | BAE65671                   |
| BC1G_01294                                            | 804          | conserved hypothetical protein                                                          | 40/58                          | Penicillium marneffeii<br>ATCC 18224    | EEA19618                   |
| <b>BC1G_01295</b><br><b>= <i>ptf<sub>BF</sub></i></b> | <b>309</b>   | hypothetical protein SS1G_09465                                                         | 81/89                          | Sclerotinia sclerotiorum 1980           | EDN93598                   |
| BC1G_01296                                            | 56           | --                                                                                      |                                |                                         |                            |
| BC1G_01297                                            | 474          | hypothetical protein SS1G_09461<br>(proteasome regulatory subunit)                      | 92/94                          | Sclerotinia sclerotiorum 1980           | EDN93594                   |
| BC1G_01298                                            | 190          | hypothetical protein SS1G_09462<br>(dihydrofolate reductase)                            | 87/92                          | Sclerotinia sclerotiorum 1980           | EDN93595                   |
| BC1G_01299                                            | 174          | conserved hypothetical protein                                                          | 49/63                          | Aspergillus flavus NRRL3357             | EED55112                   |
| BC1G_01300                                            | 135          | pyridoxamine 5'-phosphate oxidase-related<br>FMN-binding                                | 33/46                          | Methylobacterium nodulans<br>ORS 2060   | ACL59804                   |
| BC1G_01301                                            | 63           | molybdopterin-guanine dinucleotide<br>biosynthesis protein B                            | 35/49                          | Desulfatibacillum alkenivorans<br>AK-01 | ACL05682                   |
| BC1G_01302                                            | 55           | --                                                                                      |                                |                                         |                            |
| BC1G_01303                                            | 677          | hypothetical protein SS1G_09456<br>(hypothetical protein)                               | 79/87                          | Sclerotinia sclerotiorum 1980           | EDN93589                   |
| BC1G_01304                                            | 70           | --                                                                                      |                                |                                         |                            |
| BC1G_01305                                            | 80           | hypothetical protein BACCAC_03661                                                       | 46/66                          | Bacteroides caccae ATCC43185            | EDM19155                   |

Table S3: Genes surrounding the *ptf<sub>ss</sub>* gene in the genome of *Sclerotinia sclerotiorum* 1980 (accession no. CH476633)

| Gene              | Size<br>(aa) | Ortholog identified by BLAST search                                              | Identity/<br>Similarity<br>(%) | Origin                                   | Protein<br>accession<br>No |
|-------------------|--------------|----------------------------------------------------------------------------------|--------------------------------|------------------------------------------|----------------------------|
| SS1G_09455        | 178          | predicted protein                                                                | 43/55                          | Botryotinia fuckeliana B05.10            | EDN25746                   |
| SS1G_09456        | 849          | hypothetical protein BC1G_01303<br>(hypothetical protein)                        | 79/87                          | Botryotinia fuckeliana B05.10            | EDN25743                   |
| SS1G_09457        | 119          | 3-oxoacyl-(acyl-carrier-protein) synthase                                        | 44/63                          | Bdellovibrio bacteriovorus HD100         | CAE79862                   |
| SS1G_09458        | 70           | hypothetical protein TRIADDRAFT_55459                                            | 38/56                          | Trichoplax adhaerens                     | EDV25400                   |
| SS1G_09459        | 60           | predicted protein                                                                | 42/62                          | Aspergillus terreus NIH2624              | EAU33099                   |
| SS1G_09460        | 55           | conserved hypothetical protein                                                   | 42/57                          | Corynebacterium genitalium<br>ATCC 33030 | EEV90421                   |
| SS1G_09461        | 493          | hypothetical protein                                                             | 92/94                          | Botryotinia fuckeliana B05.10            | EDN25737                   |
| SS1G_09462        | 284          | hypothetical protein BC1G_01298<br>(dihydrofolate reductase)                     | 87/92                          | Botryotinia fuckeliana B05.10            | EDN25738                   |
| SS1G_09463        | 38           | --                                                                               |                                |                                          |                            |
| SS1G_09464        | 131          | putative 1,4- $\alpha$ -glucan branching enzyme                                  | 32/51                          | Toxoplasma gondii GT1                    | EEE26148                   |
| <b>SS1G_09465</b> | <b>309</b>   | hypothetical protein BC1G_01295<br><b>= <i>ptf<sub>ss</sub></i></b>              | 81/89                          | Botryotinia fuckeliana B05.10            | EDN25735                   |
| SS1G_09466        | 66           | --                                                                               |                                |                                          |                            |
| SS1G_09467        | 562          | hypothetical protein BC1G_01291<br>(DNA polymerase K)                            | 86/91                          | Botryotinia fuckeliana B05.10            | EDN25731                   |
| SS1G_09468        | 804          | hypothetical protein BC1G_01292<br>(elongation factor G)                         | 97/98                          | Botryotinia fuckeliana B05.10            | EDN25732                   |
| SS1G_09469        | 55           | --                                                                               |                                |                                          |                            |
| SS1G_09470        | 168          | hypothetical protein BC1G_01290<br>(RPEL repeat protein)                         | 92/95                          | Botryotinia fuckeliana B05.10            | EDN25730                   |
| SS1G_09471        | 518          | hypothetical protein NECHADRAFT_88411                                            | 44/58                          | Nectria haematococca mp<br>VI 77-13-4    | EEU34828                   |
| SS1G_09472        | 144          | predicted protein                                                                | 58/71                          | Botryotinia fuckeliana B05.10            | EDN25723                   |
| SS1G_09473        | 65           | predicted protein                                                                | 96/98                          | Botryotinia fuckeliana B05.10            | EDN25724                   |
| SS1G_09474        | 493          | hypothetical protein BC1G_01285<br>(Ca <sup>2+</sup> /H <sup>+</sup> antiporter) | 90/94                          | Botryotinia fuckeliana B05.10            | EDN25725                   |
| SS1G_09475        | 554          | carboxypeptidase                                                                 | 60/71                          | Aspergillus fumigatus                    | AAR96056                   |

Table S4: Genes surrounding the *ptf<sub>Pm</sub>* gene in the genome of *Penicillium marneffe* ATCC18224 (accession no. DS995899)

| Gene                             | Size<br>(aa) | Ortholog identified by BLAST search                                          | Identity/<br>Similarity<br>(%) | Origin                                       | Protein<br>accession<br>No |
|----------------------------------|--------------|------------------------------------------------------------------------------|--------------------------------|----------------------------------------------|----------------------------|
| PMAA_022220                      | 660          | putative sulfur metabolite repression control protein SconB                  | 91/93                          | Talaromyces stipitatus ATCC10500             | EED19784                   |
| PMAA_022230                      | 129          | Pc12g02210                                                                   | 41/58                          | Penicillium chrysogenum<br>Wisconsin 54-1255 | CAP79848                   |
| PMAA_022240                      |              |                                                                              |                                |                                              |                            |
| A                                | 349          | putative alcohol dehydrogenase                                               | 88/95                          | Talaromyces stipitatus ATCC10500             | EED19785                   |
| B                                | 339          | putative alcohol dehydrogenase                                               | 87/94                          | Talaromyces stipitatus ATCC10500             | EED19785                   |
| PMAA_022250                      | 131          | DNA mismatch repair protein MutL                                             | 31/48                          | Microscilla marina ATCC23134                 | EAY29540                   |
| PMAA_022260                      | 507          | conserved hypothetical protein                                               | 83/89                          | Talaromyces stipitatus ATCC10500             | EED19787                   |
| PMAA_022270                      | 871          | putative MHYT domain signaling protein                                       | 78/86                          | Talaromyces stipitatus ATCC10500             | EED19788                   |
| PMAA_022280                      | 608          | putative dihydroxy acid dehydratase Ilv3                                     | 95/98                          | Talaromyces stipitatus ATCC10500             | EED19792                   |
| PMAA_022290                      | 687          | putative protein kinase                                                      | 86/90                          | Talaromyces stipitatus ATCC10500             | EED19793                   |
| PMAA_022300                      | 206          | putative mitochondrial import inner membrane translocase subunit, TIM-family | 94/96                          | Talaromyces stipitatus ATCC10500             | EED19800                   |
| PMAA_022310                      | 1666         | HEAT repeat protein                                                          | 79/88                          | Talaromyces stipitatus ATCC10500             | EED19802                   |
| <b>PMAA_022320 364</b>           |              | hypothetical protein BC1G_01295                                              | 36/55                          | Botryotinia fuckeliana B05.10                | EDN25735                   |
| <b>= <i>ptf<sub>Pm</sub></i></b> |              |                                                                              |                                |                                              |                            |
| PMAA_022330                      | 636          | putative autophagy protein Atg20                                             | 95/97                          | Talaromyces stipitatus ATCC10500             | EED19803                   |
| PMAA_022340                      | 1448         | putative ubiquitin C-terminal hydrolase                                      | 90/94                          | Talaromyces stipitatus ATCC10500             | EED19804                   |
| PMAA_022350                      |              |                                                                              |                                |                                              |                            |
| A                                | 438          | hypothetical protein                                                         | 47/56                          | Talaromyces stipitatus ATCC10500             | EED19805                   |
| B                                | 422          | hypothetical protein                                                         | 48/57                          | Talaromyces stipitatus ATCC10500             | EED19805                   |
| C                                | 312          | hypothetical protein                                                         | 47/58                          | Talaromyces stipitatus ATCC10500             | EED19805                   |
| D                                | 308          | hypothetical protein                                                         | 47/58                          | Talaromyces stipitatus ATCC10500             | EED19805                   |
| E                                | 308          | hypothetical protein                                                         | 47/58                          | Talaromyces stipitatus ATCC10500             | EED19805                   |
| PMAA_022360                      | 102          | putative conidiation protein Con-6                                           | 78/89                          | Talaromyces stipitatus ATCC10500             | EED19807                   |
| PMAA_022370                      | 125          | conserved hypothetical protein                                               | 84/90                          | Talaromyces stipitatus ATCC10500             | EED19809                   |
| PMAA_022380                      | 650          | putative GPI anchored endo-1,3(4)- $\beta$ -glucanase                        | 58/67                          | Talaromyces stipitatus ATCC10500             | EED19810                   |
| PMAA_022390                      | 305          | conserved hypothetical protein                                               | 79/87                          | Talaromyces stipitatus ATCC10500             | EED19811                   |
| PMAA_022400                      | 166          | hypothetical protein TSTA_030760                                             | 36/45                          | Talaromyces stipitatus ATCC10500             | EED19813                   |
| PMAA_022410                      | 266          | hypothetical protein TSTA_030770                                             | 63/79                          | Talaromyces stipitatus ATCC10500             | EED19814                   |
| PMAA_022420                      | 151          | conserved hypothetical protein                                               | 89/96                          | Talaromyces stipitatus ATCC10500             | EED17425                   |

Table S5: Genes surrounding the *ptf<sub>Mc</sub>* gene in the genome of *Microsporium canis* CBS113480 (accession no. DS995704, DS995705)

| Gene                                           | Size<br>(aa) | Ortholog identified by BLAST search                                         | Identity/<br>Similarity<br>(%) | Origin                                     | Protein<br>accession<br>No |
|------------------------------------------------|--------------|-----------------------------------------------------------------------------|--------------------------------|--------------------------------------------|----------------------------|
| MCYG_05050                                     | 237          | conserved hypothetical protein                                              | 32/44                          | Neosartorya fischeri NRRL181               | EAW19675                   |
| MCYG_05051                                     | 387          | FG-GAP repeat domain-containing protein                                     | 39/51                          | Microsporium canis CBS113480               | EEQ28605                   |
| MCYG_05052                                     | 314          | hypothetical protein SS1G_05679                                             | 45/63                          | Sclerotinia sclerotiorum 1980              | EDO03199                   |
| MCYG_05053                                     | 137          | conserved hypothetical protein<br>(cercosporin toxin biosynthesis protein ) | 55/74                          | Microsporium canis CBS113480               | EEQ33879                   |
| MCYG_05054                                     | 2143         | conidial pigment polyketide synthase<br>PksP/Alb1                           | 48/65                          | Penicillium marneffeii<br>ATCC18224        | EEA24206                   |
| MCYG_05055                                     | 534          | DHA14-like major facilitator                                                | 38/58                          | Botryotinia fuckeliana                     | AF238225                   |
| MCYG_05056                                     | 202          | hypothetical protein (nitro reductase)                                      | 51/71                          | Aspergillus oryzae RIB40                   | BAE64439                   |
| MCYG_05057                                     | 370          | hypothetical protein SNOG_07051<br>(Zn-II 2Cys6 regulatory protein )        | 27/44                          | Phaeosphaeria nodorum SN15                 | EAT85702                   |
| MCYG_05058                                     | 270          | hypothetical protein SS1G_13322<br>(polyketide synthase I)                  | 35/50                          | Sclerotinia sclerotiorum 1980              | EDN98463                   |
| MCYG_05059                                     | 389          | beta-lactamase                                                              | 36/50                          | Ajellomyces dermatitidis<br>SLH14081       | EEQ72609                   |
| <b>MCYG_05060</b><br>= <i>ptf<sub>Mc</sub></i> | <b>314</b>   | hypothetical protein SS1G_09465                                             | 39/59                          | Sclerotinia sclerotiorum 1980              | EDN93598                   |
| MCYG_05061                                     | 117          | hypothetical protein MGG_08523                                              | 47/64                          | Magnaporthe grisea 70-15                   | EDJ97021                   |
| MCYG_05062                                     | 652          | hypothetical protein UREG_05020<br>(kinesin family protein)                 | 65/75                          | Uncinocarpus reesii 1704                   | EEP80178                   |
| MCYG_05063                                     | 555          | translation initiation factor eif-2b delta<br>subunit                       | 63/76                          | Aspergillus clavatus NRRL 1                | EAW13156                   |
| MCYG_05064                                     | 157          | hypothetical protein CIMG_09271                                             | 64/70                          | Coccidioides immitis RS                    | XP_001239650               |
| MCYG_05065                                     | 664          | DNA polymerase alpha subunit B family<br>protein                            | 64/79                          | Coccidioides posadasii C735 delta<br>SOWgp | EER25067                   |
| MCYG_05066                                     | 390          | conserved hypothetical protein                                              | 74/83                          | Uncinocarpus reesii 1704                   | EEP80183                   |
| MCYG_05067                                     | 379          | nuclear protein SNF4                                                        | 72/76                          | Paracoccidioides brasiliensis Pb01         | EEH40501                   |
| MCYG_05068                                     | 658          | predicted protein                                                           | 41/57                          | Uncinocarpus reesii 1704                   | EEP80185                   |
| MCYG_05069                                     | 178          | --                                                                          |                                |                                            |                            |
| MCYG_05070                                     | 479          | putative 3-hydroxyisobutyryl-CoA<br>hydrolase                               | 70/82                          | Coccidioides posadasii C735 delta<br>SOWgp | EER25075                   |

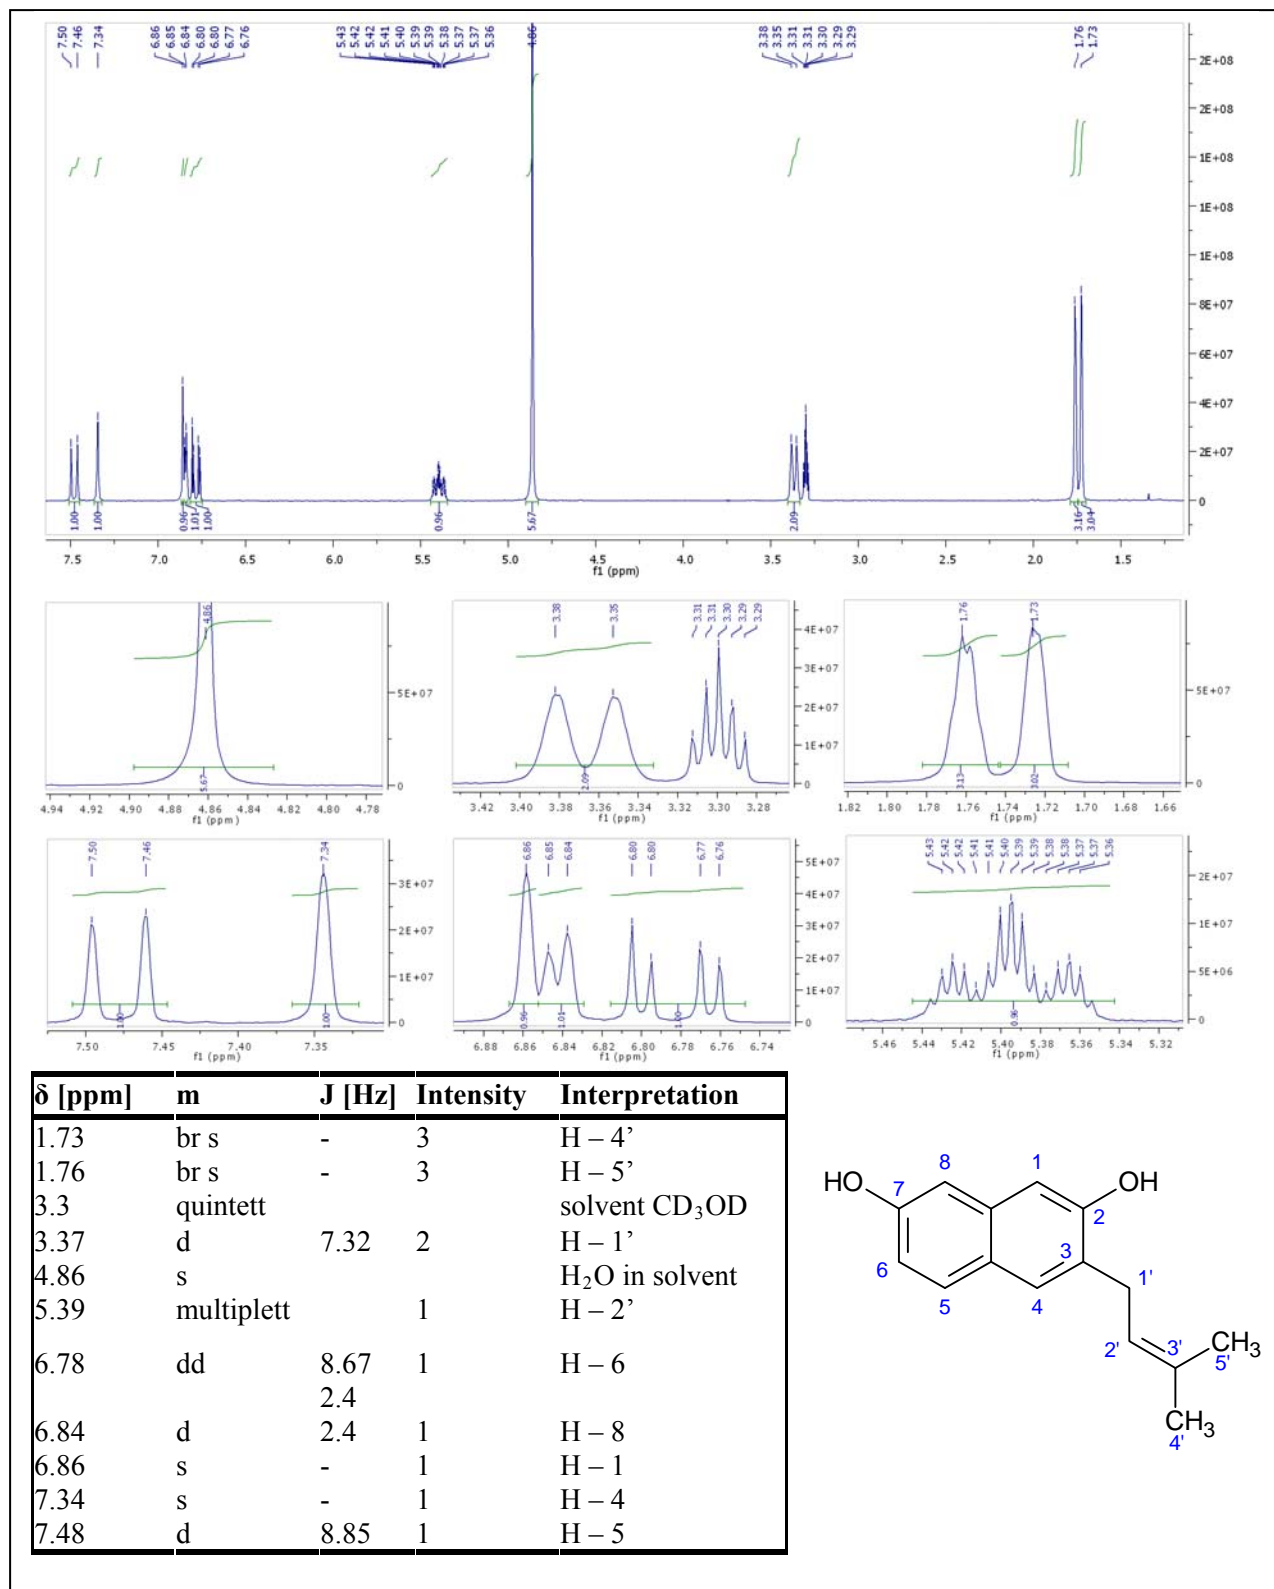

Fig. S1. <sup>1</sup>H-NMR spectrum of the enzymatic product 3-dimethylallyl-2,7-dihydroxynaphthalene formed by Ptf<sub>A1</sub> with 2,7-dihydroxynaphthalene and DMAPP. The <sup>1</sup>H-NMR spectrum was recorded at 250 MHz in a Bruker AC-250, with CD<sub>3</sub>OD as solvent.

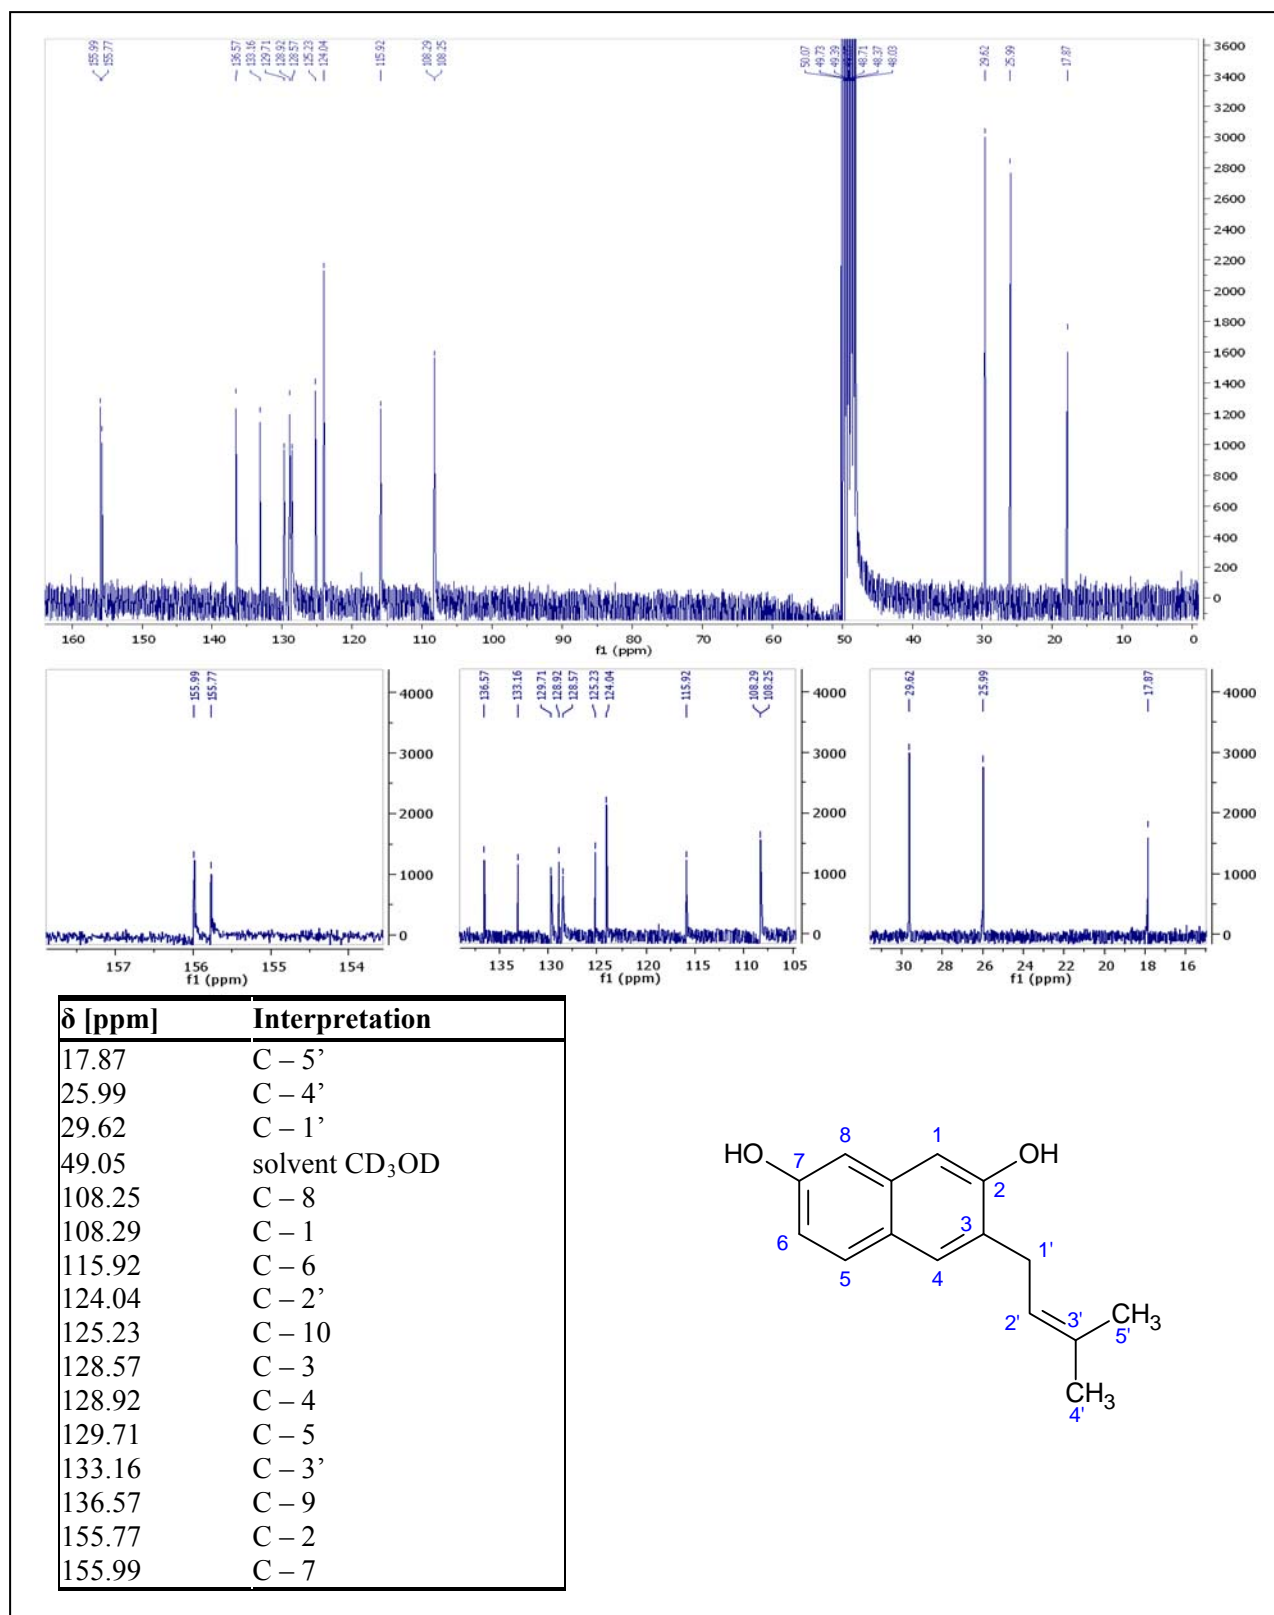

Fig. S2. <sup>13</sup>C-NMR spectrum of the enzymatic product 3-dimethylallyl-2,7-dihydroxynaphthalene formed by Ptf<sub>At</sub> with 2,7-dihydroxynaphthalene and DMAPP. The <sup>13</sup>C-NMR spectrum was broadband decoupled and recorded at 250 MHz in a Bruker AC-250, with CD<sub>3</sub>OD as solvent.
